# Supplementary material for: A twenty gene-based gene set variation score reflects the pathological progression from cirrhosis to hepatocellular carcinoma
Source: publisher site journal article supplement (doi:10.18632/aging.102518), 2019-12-06
Supplement: Supplementary file [file aging-v11i23-102518-supplementary-material-SD1.pdf]

## SUPPLEMENTARY TABLE

Supplementary Table 1. Immunohistochemical gene antibody.

| Gene     | Antibody  |
|----------|-----------|
| TOP2A    | HPA006458 |
| CDC20    | CAB004525 |
| PTTG1    | HPA008890 |
| CDCA5    | HPA023691 |
| CCNB2    | HPA008873 |
| PRC1     | HPA034521 |
| KIF20A   | HPA036909 |
| SF3B4    | HPA028578 |
| HSP90AB1 | CAB005230 |
| CCT3     | HPA006543 |
| SETDB1   | HPA018142 |
| VPS45    | HPA027425 |
| SPDL1    | HPA048146 |
| RACGAP1  | HPA043912 |
| ZNF282   | HPA024374 |
| USP21    | HPA028397 |
| PLOD3    | HPA001236 |
